# Supplementary material
Source: PubMed Central journal article supplement (PMC3182751)
Supplement: 1106421108_pnas.201106421SI.pdf [file 1106421108_pnas.201106421SI.pdf]

# Supporting Information

Pendin et al. 10.1073/pnas.1106421108

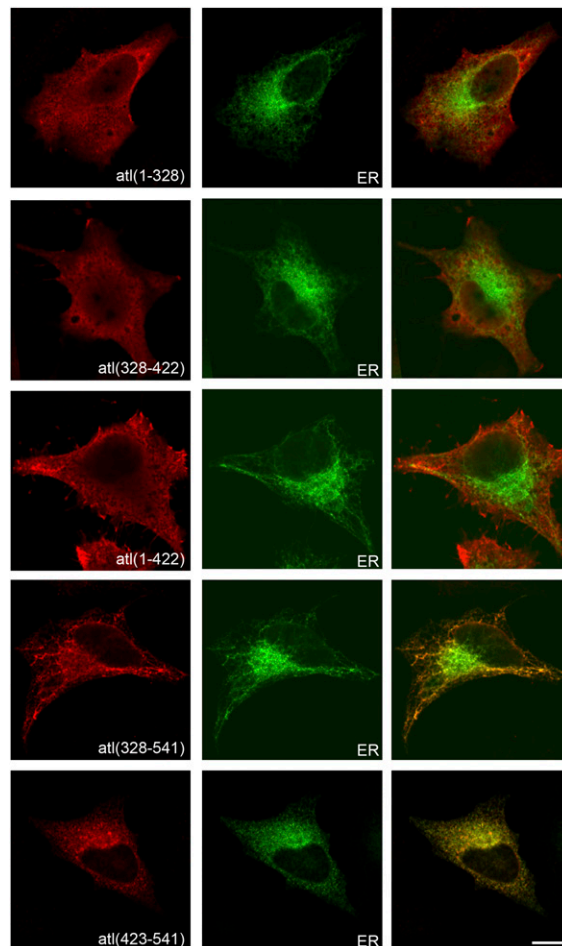

**Fig. S1.** Subcellular localization of atlastin fragments. HeLa cells were transfected with the indicated atlastin fragments. Only fragments containing the transmembrane domains display reticular localization. GFP-Sec61 $\beta$  was used as endoplasmic reticulum (ER) marker. (Scale bar, 10  $\mu$ m.)

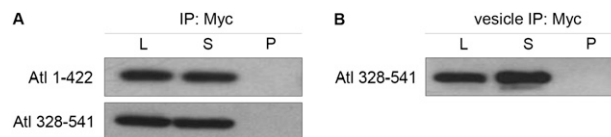

**Fig. S2.** HeLa cells were transfected with the indicated HA-tagged constructs. Lysates (A) or microsome fraction (B) were prepared and immunoprecipitated with anti-myc antibodies. Western blot analysis using anti-HA antibodies shows that these fragments were not immunoprecipitated aspecifically. L, lysate; S, supernatant; P, pellet.

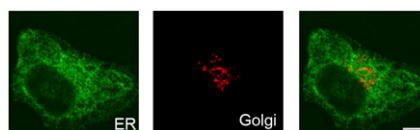

**Fig. S3.** Endoplasmic reticulum (ER) and Golgi morphology in untransfected control cells. PDI and GM130 were used as ER and Golgi markers, respectively. (Scale bar, 10  $\mu$ m.)

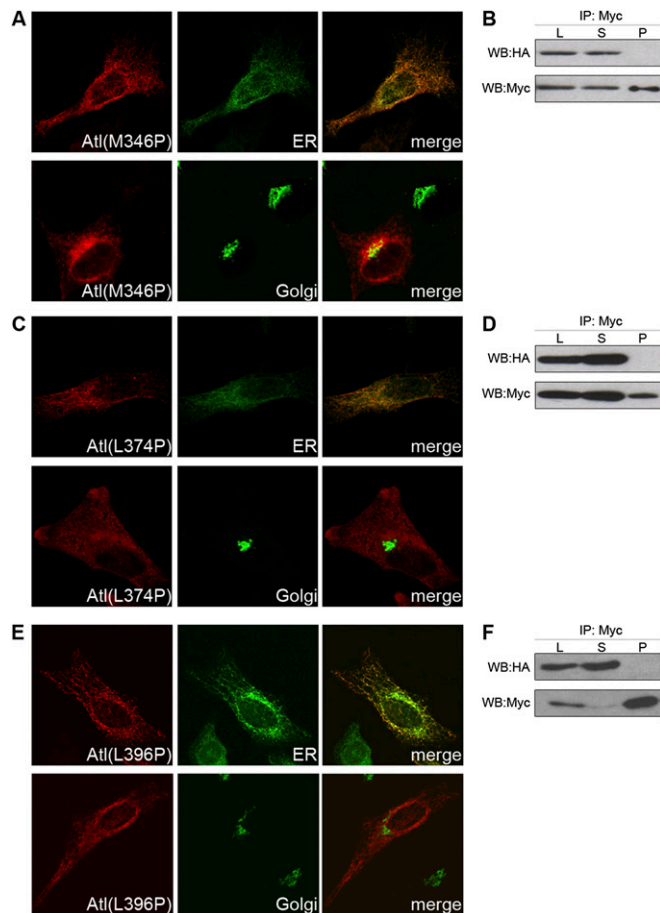

**Fig. 54.** Proline mutations within the  $\alpha$ -helices of the middle domain prevent self-association and abolish atlastin function. (A, C, and E) HeLa cells transfected with atlastin(M346P) (A), atlastin(L374P) (C), or atlastin(L396P) (E) show normal endoplasmic reticulum (ER) and Golgi morphology; PDI and GM130 were used as ER and Golgi markers, respectively. (Scale bars, 10  $\mu$ m.) (B, D, and F) Coimmunoprecipitation experiments using the single proline mutants M346P (B), L374P (D), or L396P (F) demonstrate the inability of these mutants to self-assemble. L, lysate; S, supernatant; P, pellet.

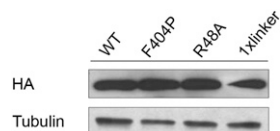

**Fig. 55.** Expression levels of wild-type, F404P, R48A, and 1xlinker atlastins upon transfection in HeLa cells. Western blot analysis shows that all atlastin variants are expressed at similar levels. Equal amounts of proteins were loaded in each lane.

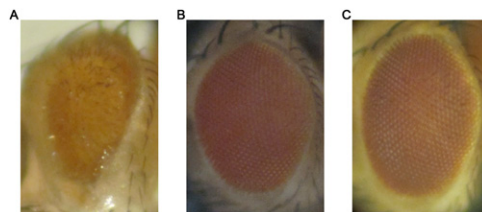

**Fig. 56.** (A) Overexpression of atlastin under the control of GMR-Gal4 causes a small eye phenotype. (B and C) GMR-Gal4-driven overexpression of atlastin (F404P) (B) and atlastin(3xlinker) (C) has no phenotypic consequences.
